# Supplementary material
Source: PubMed Central journal article supplement (PMC6173286)
Supplement: NIHMS79842-supplement-Supplementary_information.pdf [file NIHMS79842-supplement-Supplementary_information.pdf]

### 3 Supplementary Movies and 3 Supplementary Figures

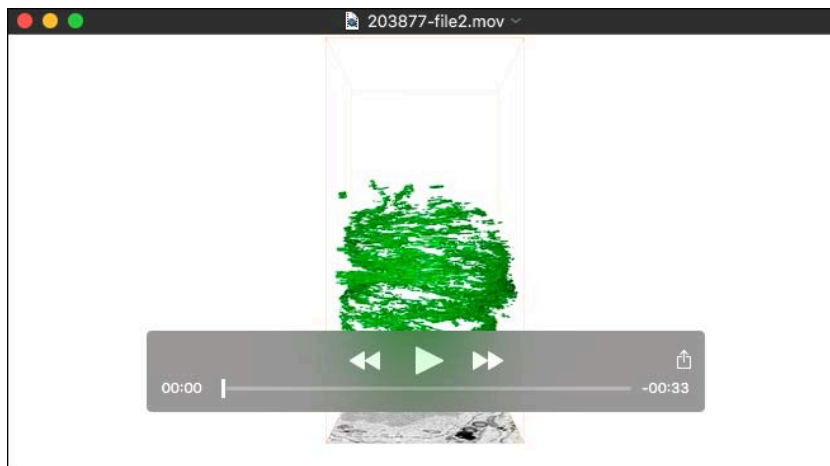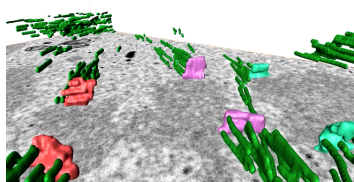

**Supplementary Movie 1** Movie to show 3D rendering of a SBF-SEM dataset from a HeLa cell at metaphase.

MTs (green) are shown together with chromosomes (red) and kinetochores, where visible are shown as colored patches. Same colors indicate the sister pairs.

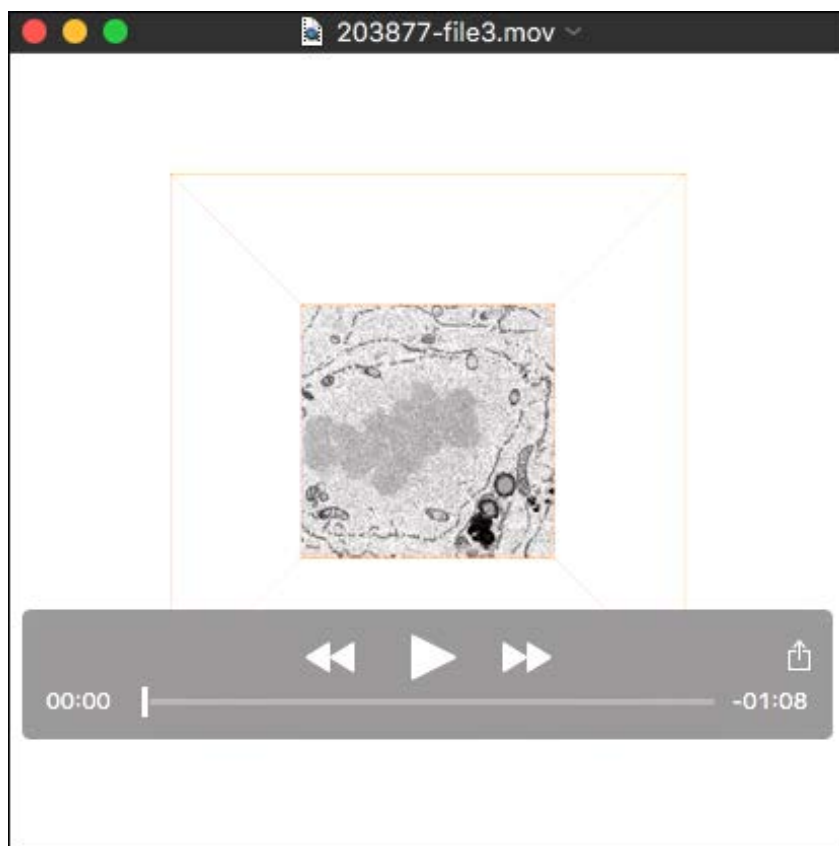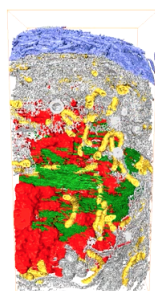

**Supplementary Movie 2** Spindle exclusion zone.

A movie of 3D rendering of an SBF-SEM dataset from a HeLa cell at metaphase. MTs (green) are shown together with chromosomes (red) and membranes are colored as described in Figure 7. The exclusion zone is modeled as a translucent blue bubble.

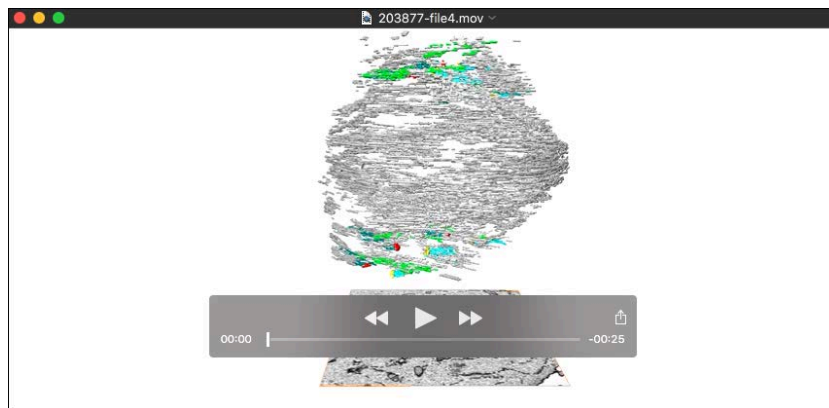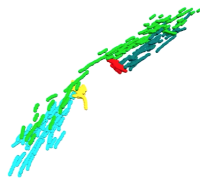

**Supplementary Movie 3** Bridging fibers.

A movie of 3D rendering of an SBF-SEM dataset from a HeLa cell at metaphase to accompany Figure 8.

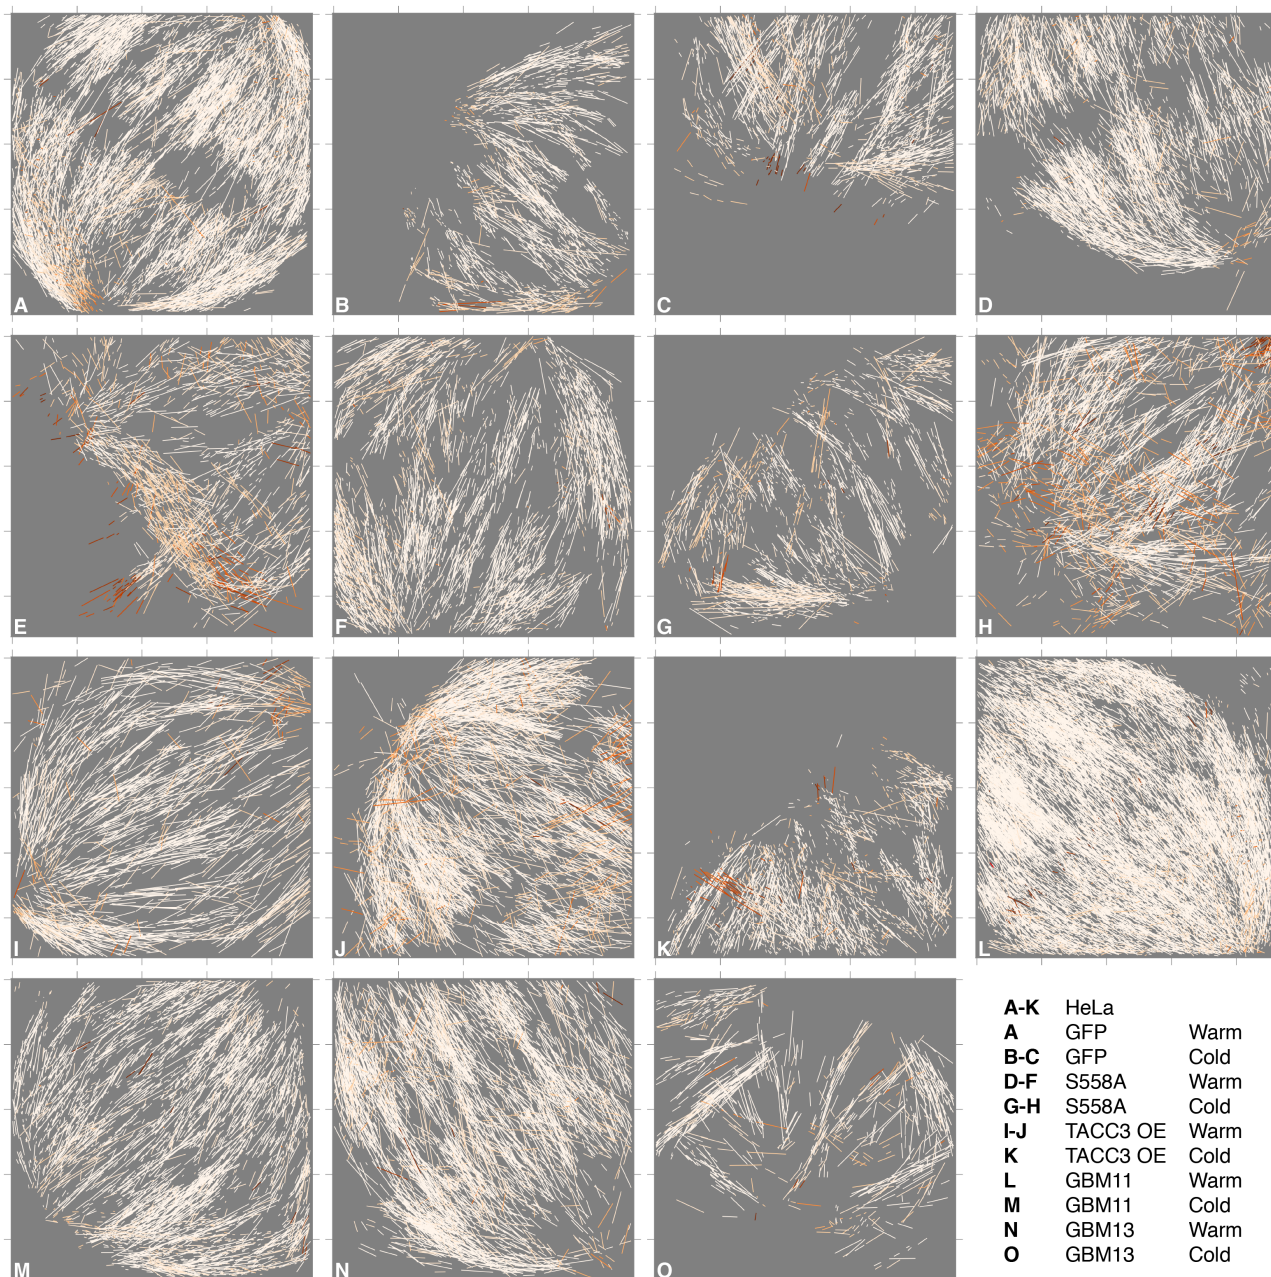

**Supplementary Figure 1. MT datasets described in this paper.**

Z-projections of all MTs segmented in each dataset colored according to angle deviations from the ellipse model, as in Figure 5.

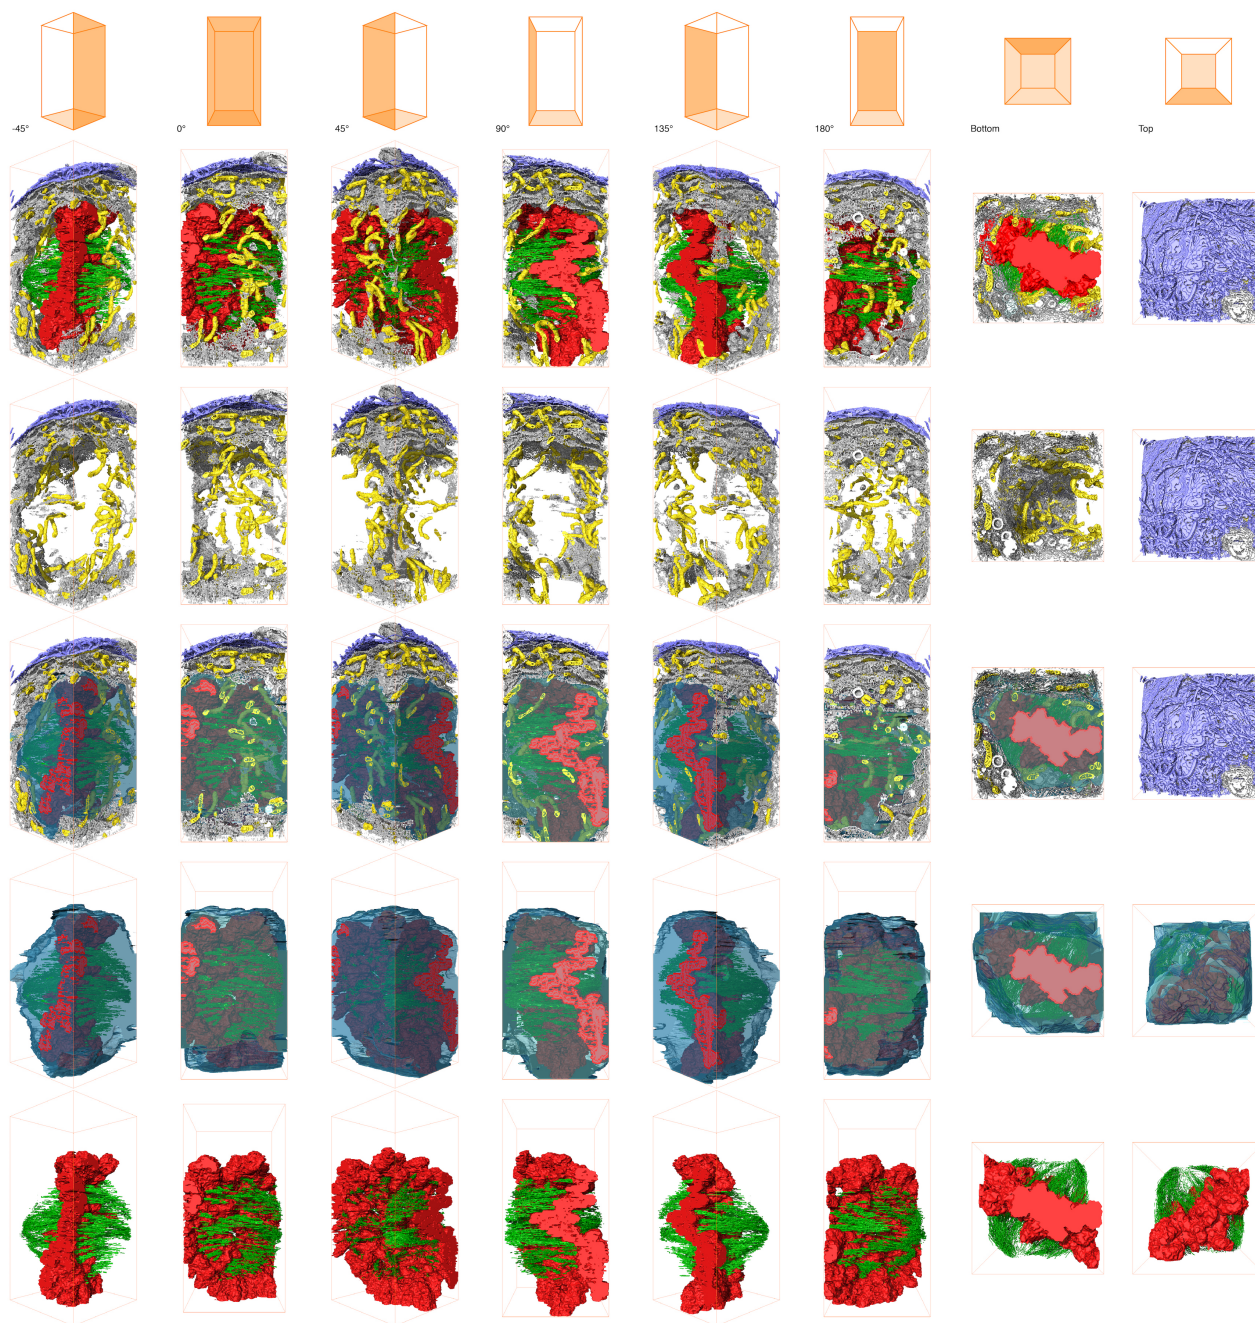

**Supplementary Figure 2.** The mitotic spindle exists in a spindle “exclusion zone”. Various views of a 3D rendering of an SBF-SEM dataset from a HeLa cell at metaphase to accompany Figure 7.

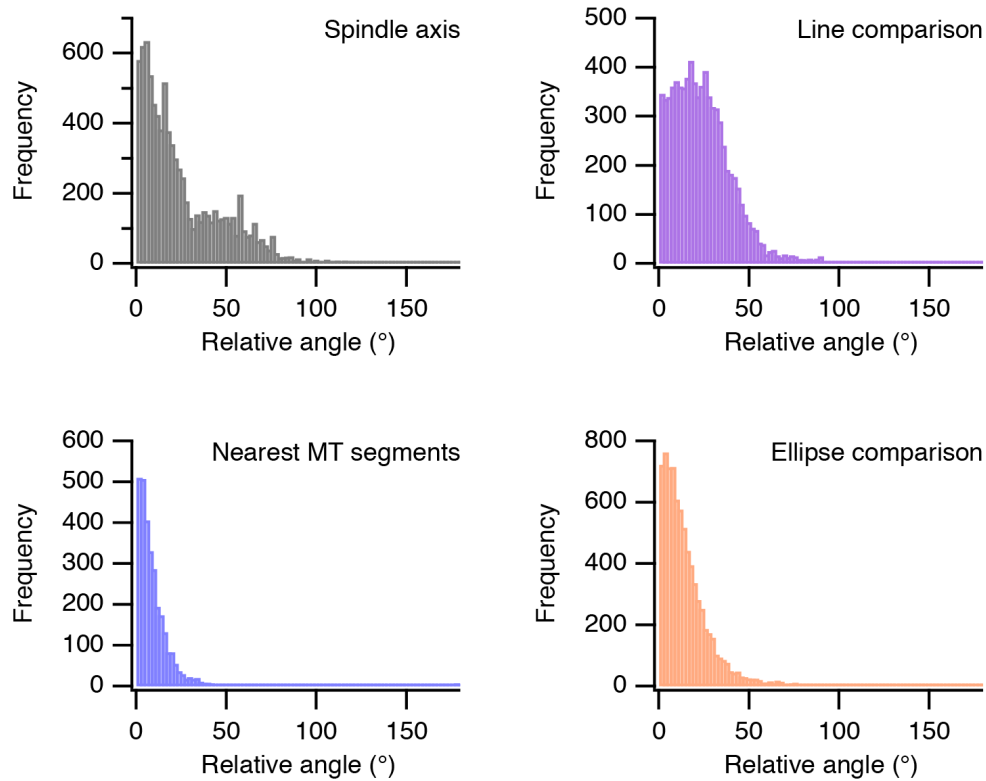

**Supplementary Figure 3. Comparison of ellipse model with other spindle models.**

The same MT segmentation dataset is shown compared to four different models.

- (A) spindle axis, comparison to the a straight line from spindle pole to the opposite pole.
- (B) nearest MT segments, comparison to MT segments that lie within  $x$  nm.
- (C) line comparison, using a straight line model, i.e. diamond shaped spindle with no curvature.
- (D) ellipse comparison, using the ellipse model as described (selected method).
